# Supplementary material for: Tailoring the shell thickness of yolk–shell structured carbon microspheres: applications in metal selenide and carbon composite microspheres for enhanced sodium ion storage properties
Source: Royal Society of Chemistry journal article supplement (doi:10.1039/d3ta04705a), 2023-01-01
Supplement: d3ta04705a1.pdf [file d3ta04705a1.pdf]

## SUPPLEMENTARY INFORMATION

### **Tailoring shell thickness of yolk-shell structured carbon microspheres : applications in metal selenide and carbon composite microspheres for enhanced sodium ion properties**

Hyo Yeong Seo,<sup>‡a</sup> Jae Hyeon Choi,<sup>‡a</sup> Yeong Beom Kim,<sup>ac</sup> Jung Sang Cho,<sup>\*b</sup> Yun Chan Kang,<sup>\*c</sup> and Gi Dae Park<sup>\*a</sup>

*<sup>a</sup>Department of Advanced Materials Engineering, Chungbuk National University, Chungdae-ro 1, Seowon-Gu, Cheongju, Chungbuk 28644, Republic of Korea, E-mail: gdpark@chungbuk.ac.kr; Fax: (+82) 43-271-3222*

*<sup>b</sup>Department of Engineering Chemistry, Chungbuk National University, Chungdae-ro 1, Seowon-Gu, Cheongju, Chungbuk 28644, Republic of Korea, E-mail: jscho@cbnu.ac.kr; Fax: (+82) 43-262-2380*

*<sup>c</sup>Department of Materials Science and Engineering, Korea University, Anam-Dong, Seongbuk-Gu, Seoul 136-713, Republic of Korea, E-mail: yckang@korea.ac.kr; Fax: (+82) 2-928-3584*

<sup>‡</sup> These authors contributed equally to this work.

## Materials Characterizations

The morphological characteristics of the samples were investigated via scanning electron microscopy (SEM, VEGA3) and field emission-transmission electron microscopy (FE-TEM, JEM-2100F) at the Korea Basic Science Institute (Daegu). The crystal structures of the samples were analyzed using X-ray diffraction spectroscopy (XRD, X'Pert PRO with Cu K $\alpha$  radiation,  $\lambda = 1.5418 \text{ \AA}$ ). X-ray photoelectron spectroscopy (XPS) of the samples was performed using ESCALAB-250 with Al K $\alpha$  radiation (1486.6 eV). Thermogravimetric (TG) analysis (Pyris 1 Thermogravimetric Analyzer, PerkinElmer) was conducted in the range 25–800 °C at 10 °C min<sup>-1</sup> under an air atmosphere. The surface area and porosities of the samples were analyzed via Brunauer–Emmett–Teller (BET) method, using high-purity N<sub>2</sub>. The structural characteristics of carbon in the sample were investigated via Raman spectroscopy (Jobin Yvon LabRam HR800, excited by a 632.8-nm He/Ne laser) at room temperature.

## Electrochemical Measurements

To measure the electrochemical properties of the samples for SIBs, a 2032-type coin cell constructed from electrodes prepared via the slurry process was utilized. For the anode electrode, the active materials, carbon black (Super-P), and sodium carboxymethyl cellulose (CMC) in a weight ratio of 7:2:1 were uniformly mixed with water solvent in a mortar. The well-mixed slurry was coated onto Cu foil using a doctor blade and dried in a vacuum oven for 3 h. Sodium metal and a microporous polypropylene film were used as the counter electrode and separator, respectively. The electrolyte for SIBs was 1M NaClO<sub>4</sub> dissolved in ethylene carbonate/dimethyl carbonate (1/1 v/v). The diameter and mass loading of the negative electrode were 14 mm and 1.4 mg cm<sup>-2</sup>, respectively. The discharge–charge characteristics of the samples were analyzed via cycling in 0.001–3.0 V potential range at various current densities. Cyclic voltammetry (CV) analysis was conducted at a scan rate of 0.1 mV s<sup>-1</sup>. Electrochemical impedance spectroscopy (EIS, ZIVE SP1) measurements of the electrode were performed over a frequency range of 0.01 Hz – 100 kHz. In-situ EIS analysis was performed at preselected potentials during the discharge and charge process at a current density of 0.1 A g<sup>-1</sup>. Galvanostatic intermittent titration (GITT) measurements were performed at a constant current density of 0.1 A g<sup>-1</sup> with a current pulse duration of 20 min and relaxation time of 60 min.

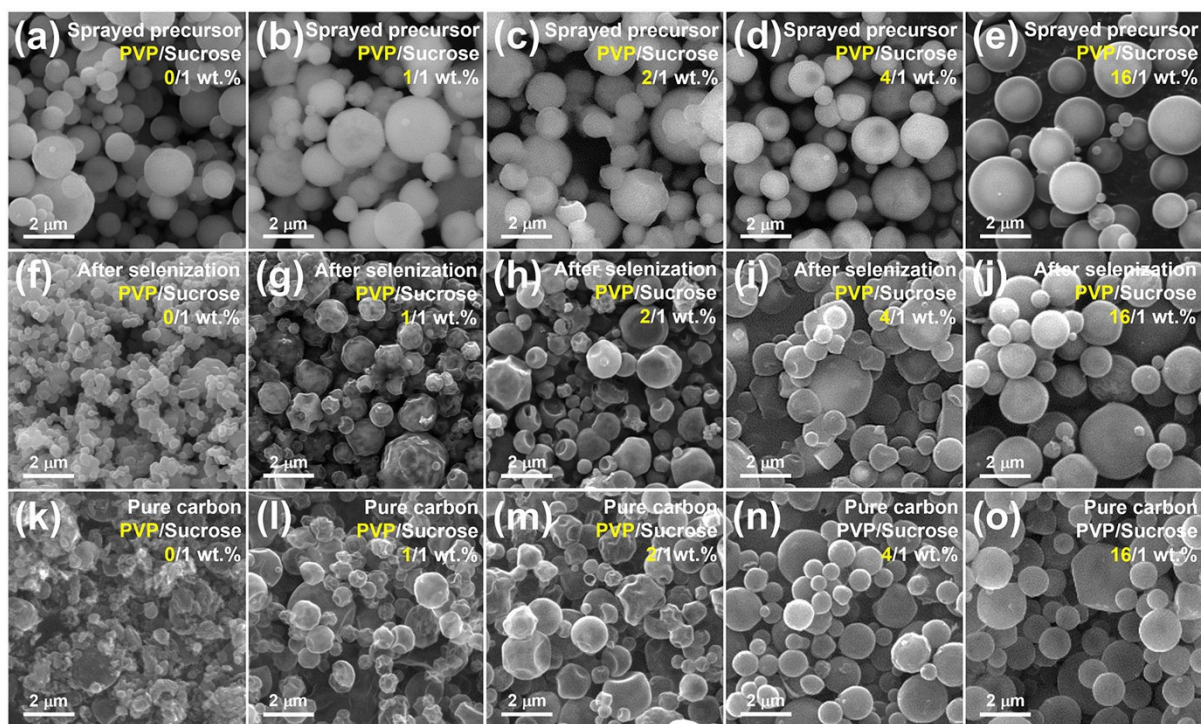

**Fig. S1** SEM images of (a-e) spray pyrolyzed precursor with different ratio of PVP/sucrose, (f-j) MgO-MgSe-C@C obtained after selenization of precursor, and (k-o) carbon yolk-shell obtained after etching process: (a, f and k) PVP/sucrose 0/1 wt%, (b, g and l) PVP/sucrose 1/1 wt%, (c, h and m) PVP/sucrose 2/1 wt%, (d, i and n) PVP/sucrose 4/1 wt%, and (e, j and o) PVP/sucrose 16/1 wt%.

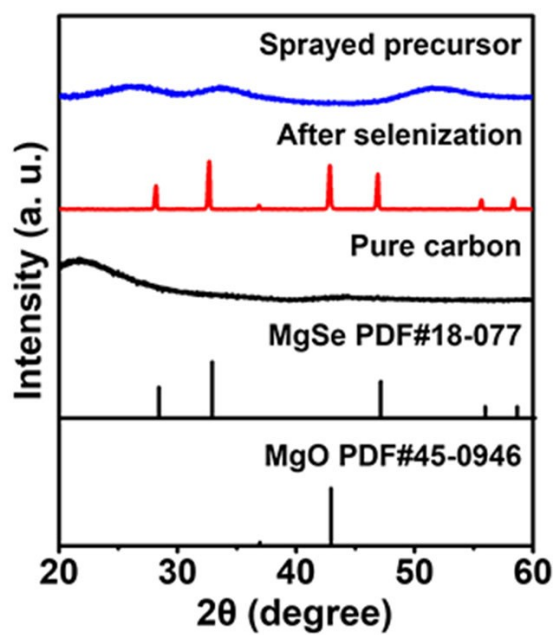

**Fig. S2** XRD patterns of spray pyrolyzed precursor, post treated MgO-MgSe-C@C microsphere, after etched C-YS 2/1 microsphere from spray solution containing Sn oxalate, Mg nitrate, sucrose and PVP.

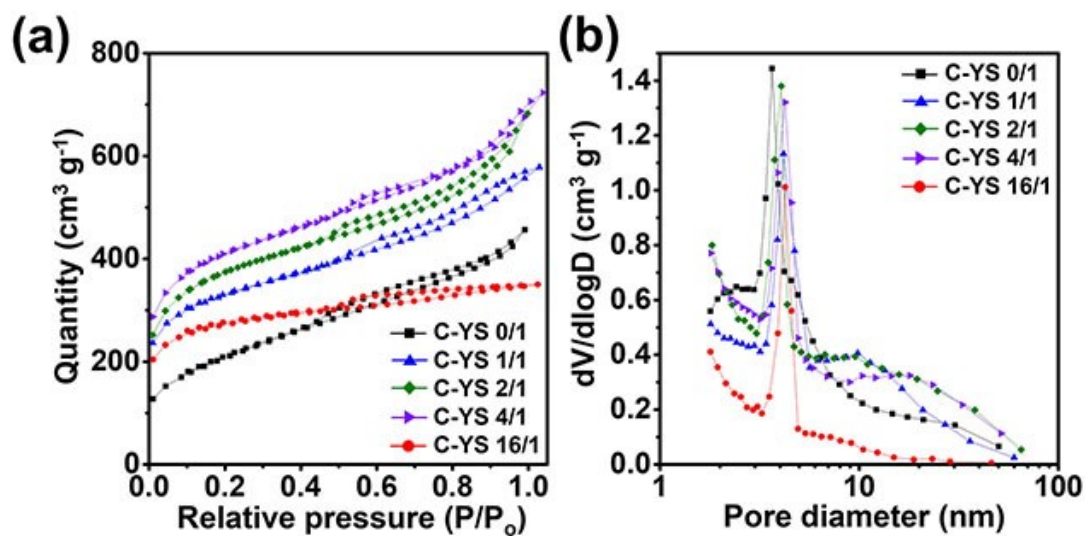

**Fig. S3** (a)  $N_2$  gas adsorption and desorption isotherms and (b) BJH pore-size distribution of carbon yolk-shell microspheres with different ratio of PVP/sucrose.

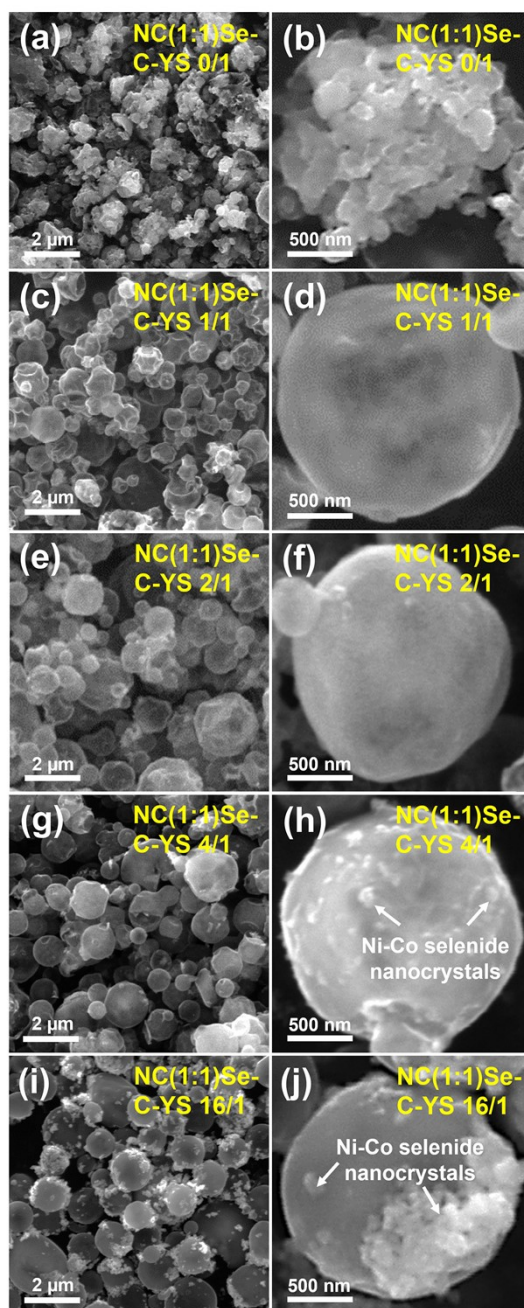

**Fig. S4** SEM images of NC(1:1)Se-C-YS with different ratio of PVP/sucrose: (a and b) NC(1:1)Se-C-YS 0/1, (c and d) NC(1:1)Se-C-YS 1/1, (e and f) NC(1:1)Se-C-YS 2/1, (g and h) NC(1:1)Se-C-YS 4/1, and (i and j) NC(1:1)Se-C-YS 16/1.

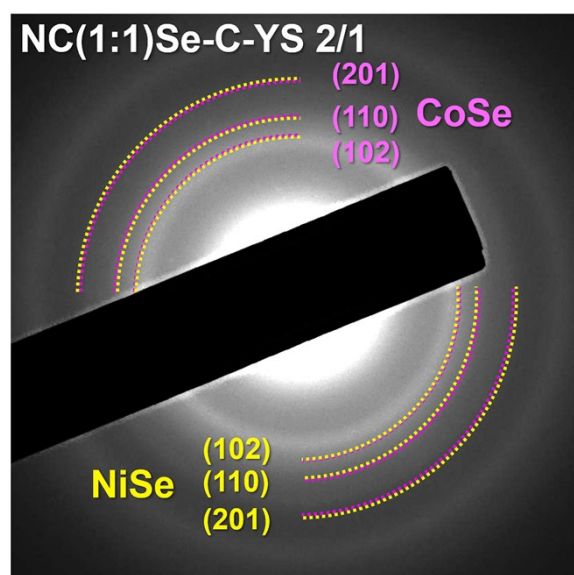

**Fig. S5** SAED patterns of NC(1:1)Se-C-YS 2/1.

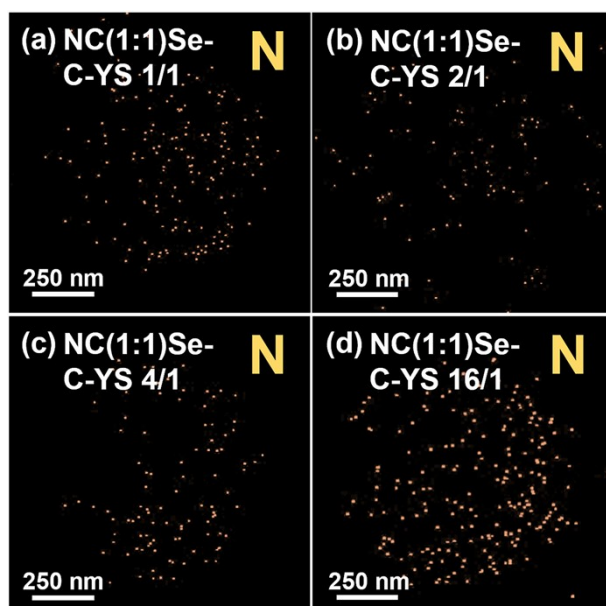

**Fig. S6** Mapping images of N: (a) NC(1:1)Se-C-YS 1/1, (b) NC(1:1)Se-C-YS 2/1, (c) NC(1:1)Se-C-YS 4/1, and (d) NC(1:1)Se-C-YS 16/1.

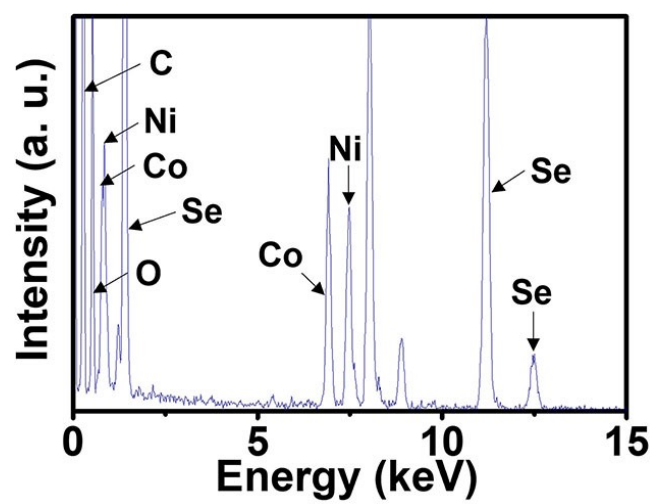

**Fig. S7** EDS spectrum of NC(1:1)Se-C-YS 2/1.

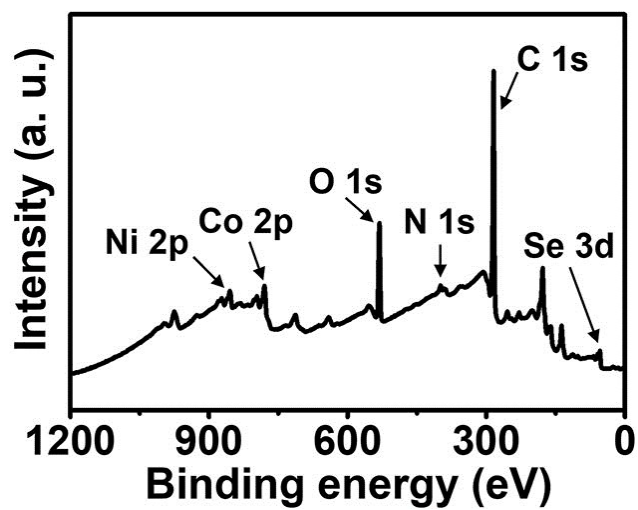

**Fig. S8** XPS survey spectrum of NC(1:1)Se-C-YS 2/1.

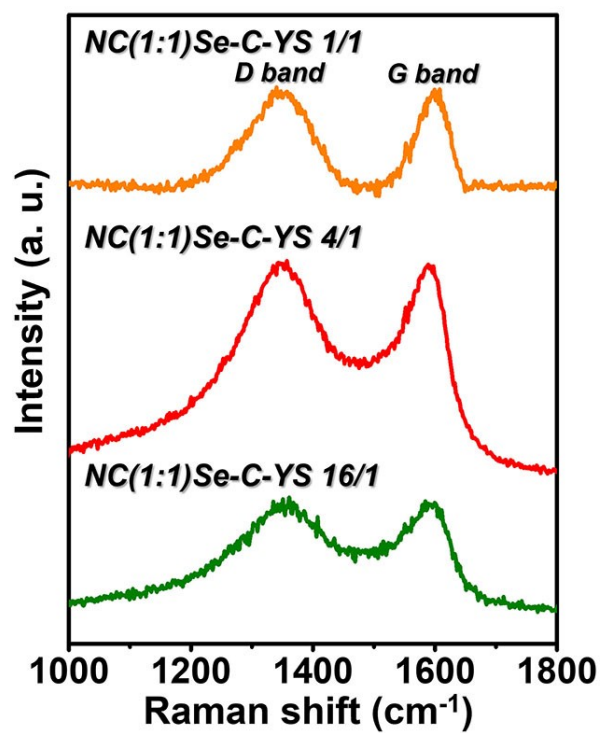

**Fig. S9** Raman spectra of NC(1:1)Se-C-YS 1/1, NC(1:1)Se-C-YS 4/1, and NC(1:1)Se-C-YS 16/1.

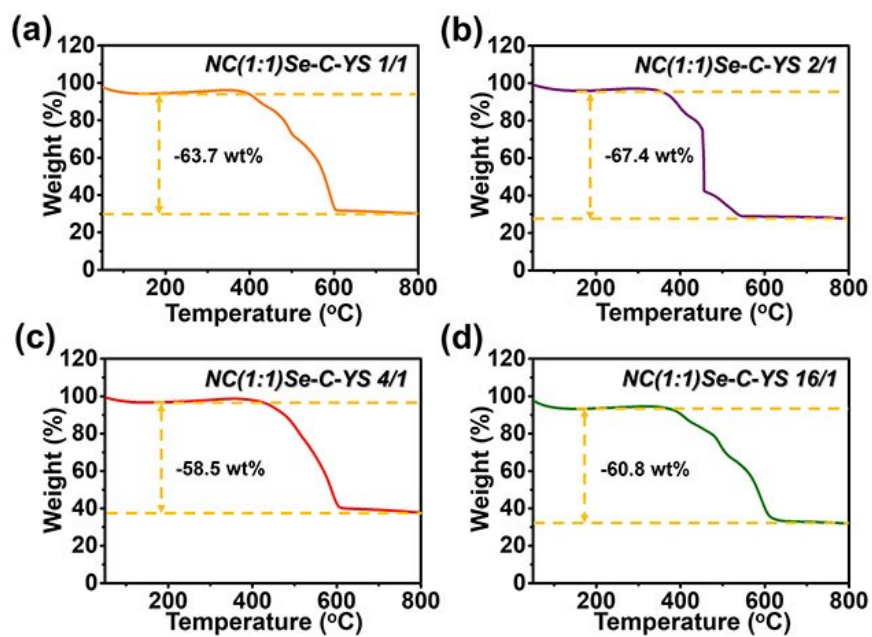

**Fig. S10** TG curves of (a) NC(1:1)Se-C-YS 1/1, (b) NC(1:1)Se-C-YS 2/1, (c) NC(1:1)Se-C-YS 4/1 and (d) NC(1:1)Se-C-YS 16/1.

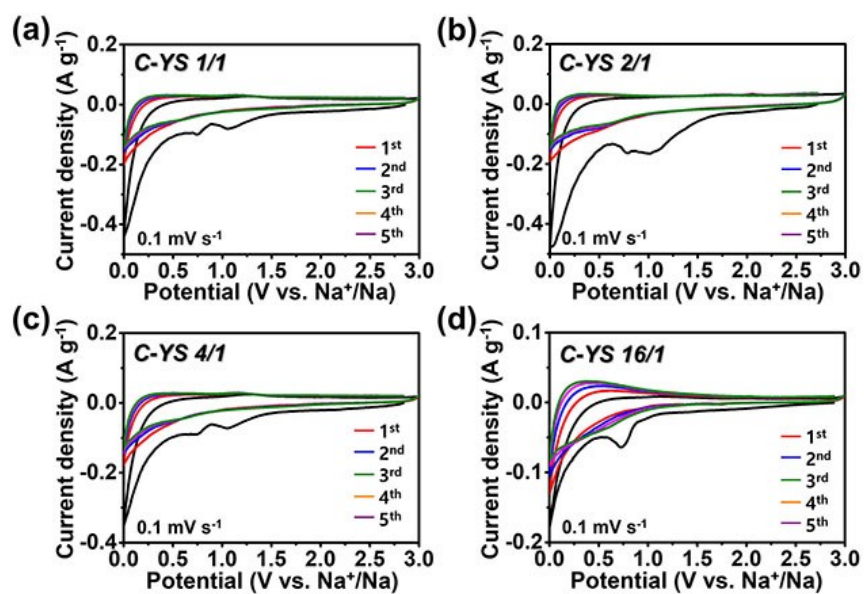

**Fig. S11** CV curves of (a) C-YS 1/1, (b) C-YS 2/1, (c) C-YS 4/1, and (d) C-YS 16/1.

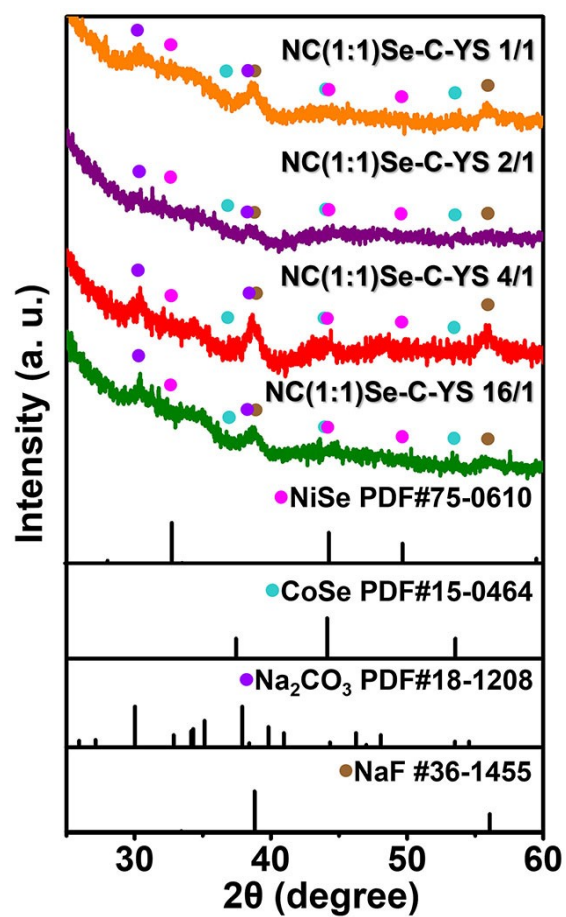

**Fig. S12** XRD patterns of NC(1:1)Se-C-YS 1/1, NC(1:1)Se-C-YS 2/1, NC(1:1)Se-C-YS 4/1 and NC(1:1)Se-C-YS 16/1 electrode obtained after 100 cycles.

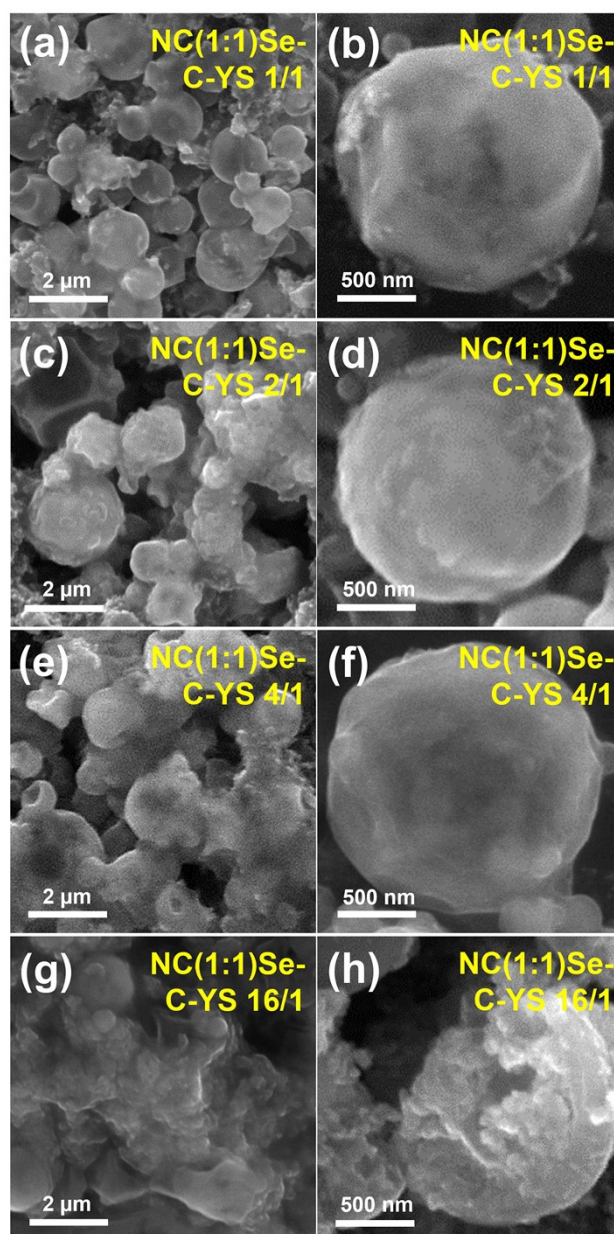

**Fig. S13** SEM images after 100 cycles of (a and b) NC(1:1)Se-C-YS 1/1, (c and d) NC(1:1)Se-C-YS 2/1, (e and f) NC(1:1)Se-C-YS 4/1, and (g and h) NC(1:1)Se-C-YS 16/1.

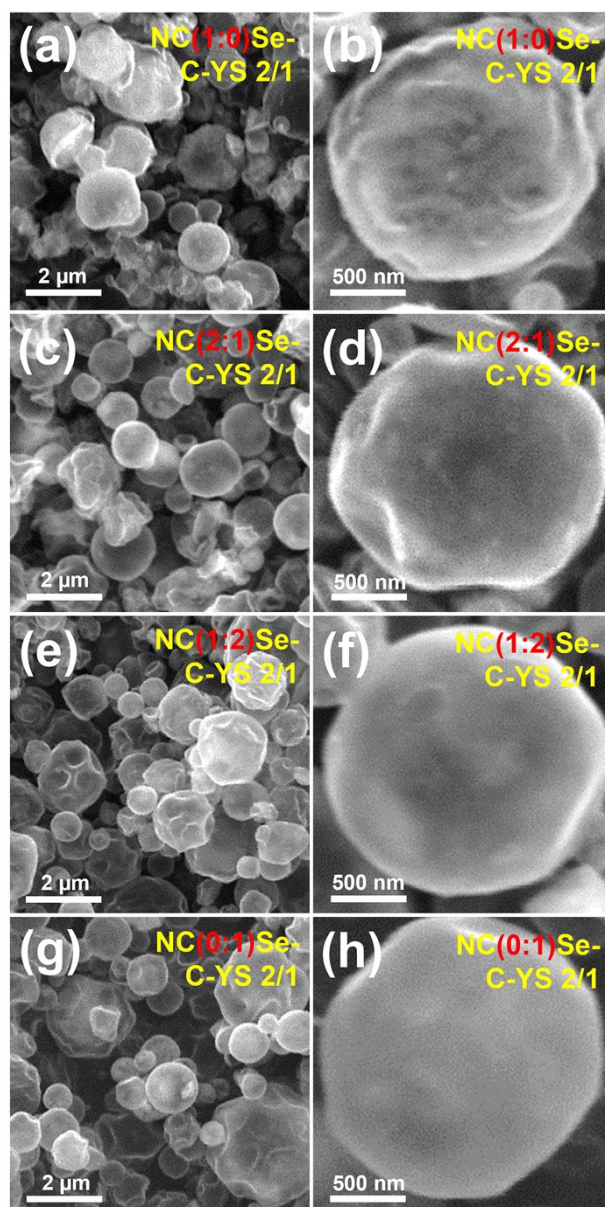

**Fig. S14** SEM images of (a and b) NC(1:0)Se-C-YS 2/1, (c and d) NC(2:1)Se-C-YS 2/1, (e and f) NC(1:2)Se-C-YS 2/1, (g and h) and NC(0:1)Se-C-YS 2/1.

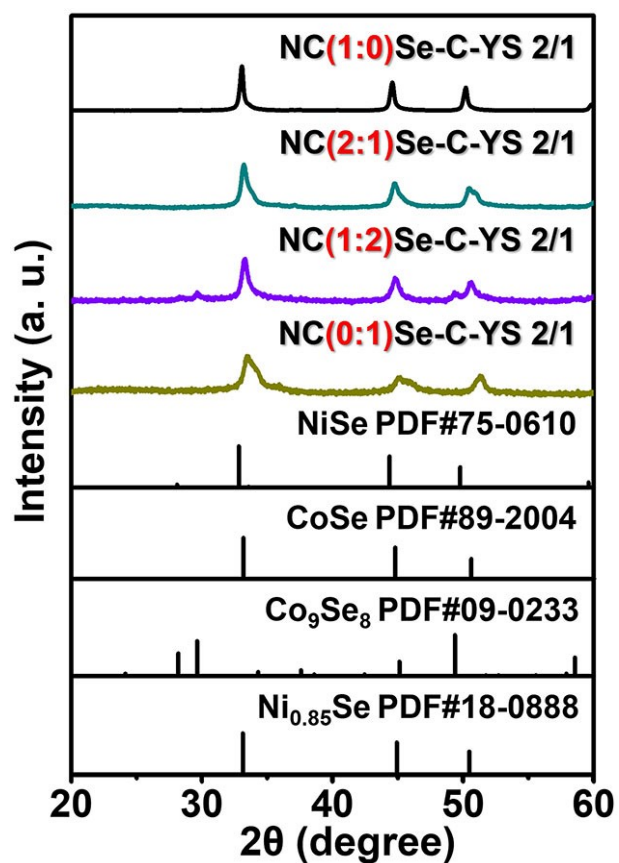

**Fig. S15** XRD patterns of four nickel-cobalt selenide carbon yolk-shell microspheres with different ratios of Ni and Co: NC(1:0)Se-C-YS 2/1, NC(2:1)Se-C-YS 2/1, NC(1:2)Se-C-YS 2/1, and NC(0:1)Se-C-YS 2/1.

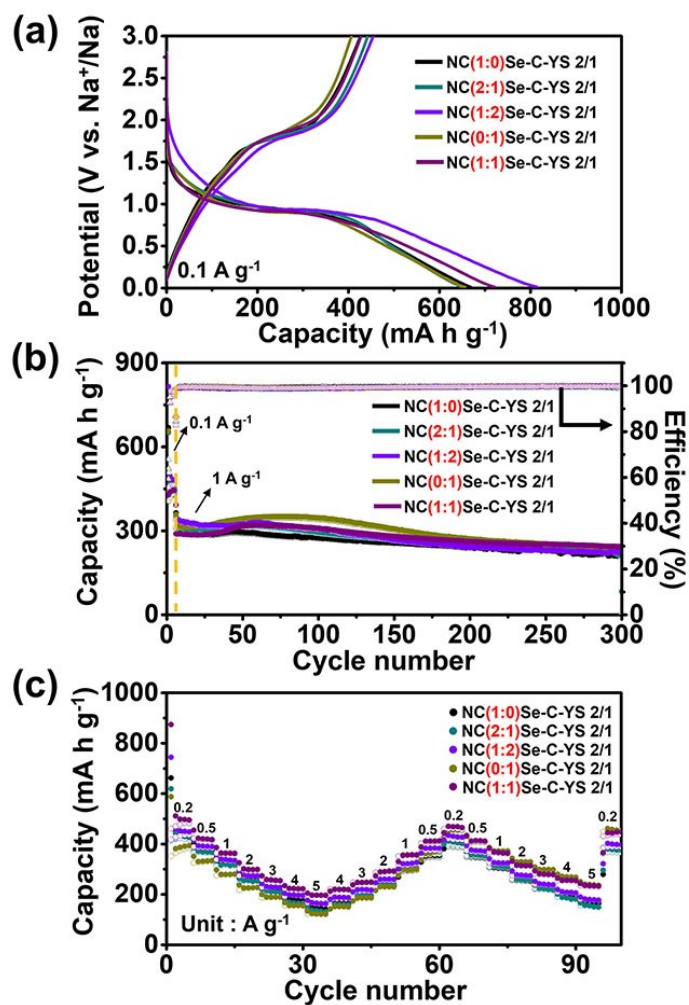

**Fig. S16** Electrochemical properties of NC(1:0)Se-C-YS 2/1, NC(2:1)Se-C-YS 2/1, NC(1:1)Se-C-YS 2/1, NC(1:2)Se-C-YS 2/1, and NC(0:1)Se-C-YS 2/1: (a) initial discharge and charge curves, (b) cyclic performances at a current density of 1 A g<sup>-1</sup> after the initial 5 cycles at 0.1 A g<sup>-1</sup> and (c) triplicate evaluations of rate performances from 0.2 to 5 A g<sup>-1</sup>.

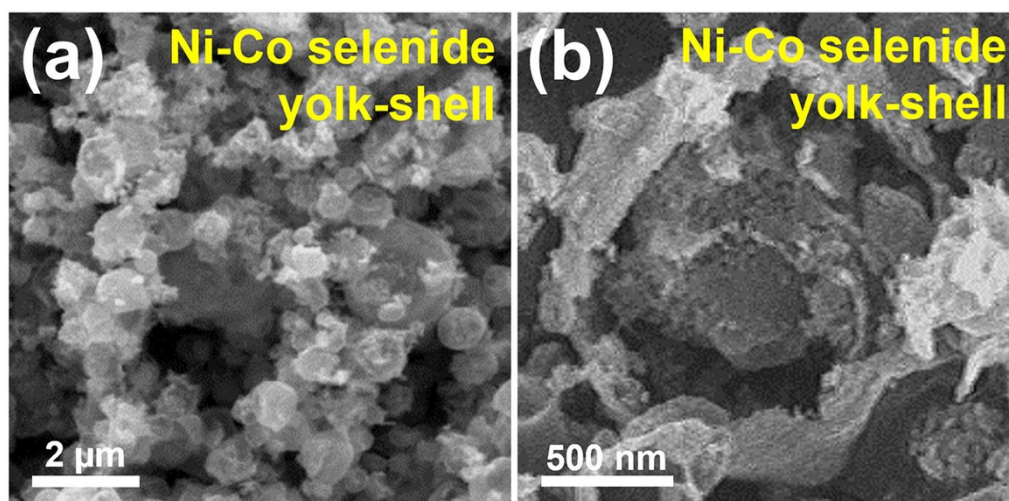

**Fig. S17** SEM images of nickel-cobalt selenide yolk-shell.

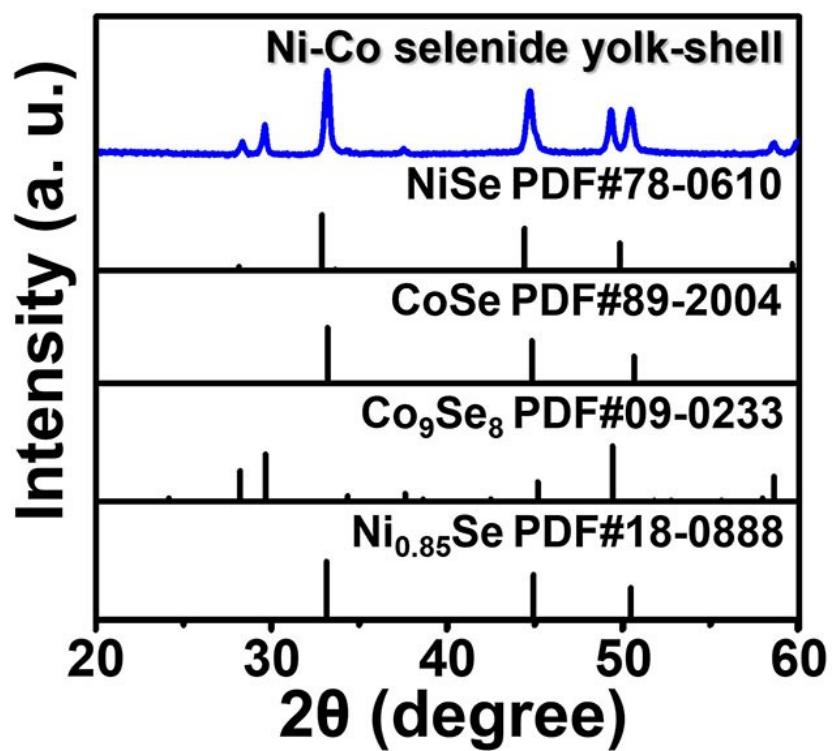

**Fig. S18** XRD pattern of nickel-cobalt selenide yolk-shell.

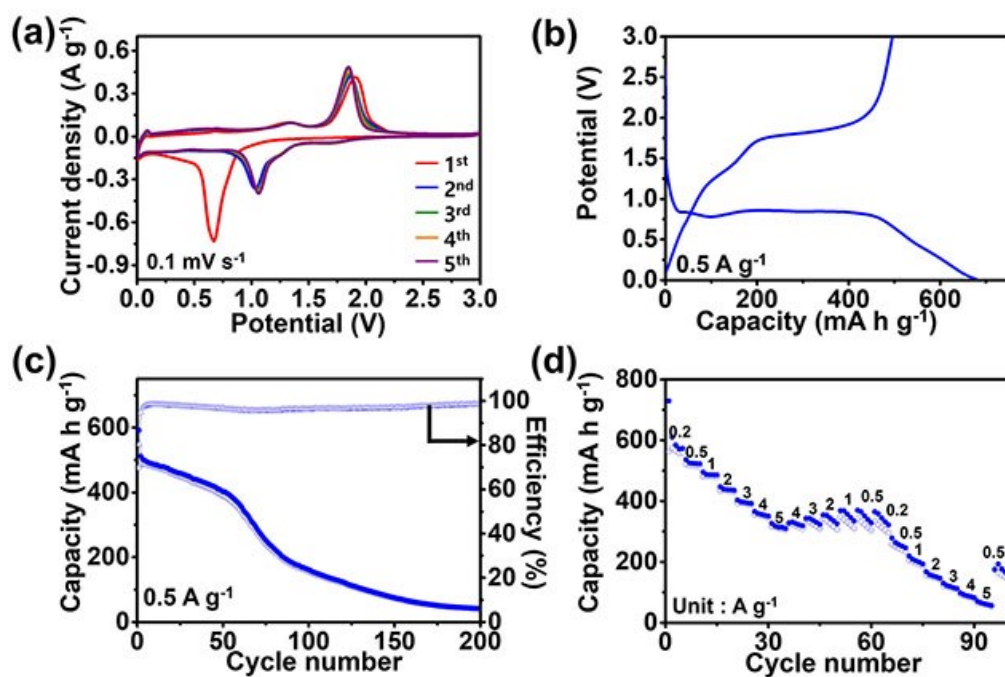

**Fig. S19** Electrochemical properties of nickel-cobalt selenide yolk-shell for SIBs. (a) CV curves, (b) initial discharge and charge curves, (c) cycle performance at a current density of 0.5 A g<sup>-1</sup>, and (d) rate performances.

**Table. S1** Weight percentage of elements based on the EDS spectrum of NC(1:1)Se-C-YS  
2/1.

| <b>Element</b> | <b>Line Type</b> | <b>k Factor</b> | <b>Absorption Correction</b> | <b>Wt%</b> |
|----------------|------------------|-----------------|------------------------------|------------|
| <b>C</b>       | K series         | 2.773           | 1.00                         | 51.10      |
| <b>O</b>       | K series         | 2.029           | 1.00                         | 8.81       |
| <b>Co</b>      | K series         | 1.173           | 1.00                         | 7.91       |
| <b>Ni</b>      | K series         | 1.145           | 1.00                         | 7.99       |
| <b>Se</b>      | K series         | 1.607           | 1.00                         | 24.2       |
| <b>Total</b>   |                  |                 |                              | 100.00     |

**Table. S2** Comparison of electrochemical performances of various nickel-cobalt selenide-C anode materials for SIBs reported in the previous literatures.

| Electrode material                                         | Preparation method                                                                    | Cyclic performance<br>(mA h g <sup>-1</sup> )<br>{cycle #}<br>[current density<br>(A g <sup>-1</sup> )] | Rate performance<br>(mA h g <sup>-1</sup> )<br>[current density<br>(A g <sup>-1</sup> )] | Potential range [V] | Ref.     |
|------------------------------------------------------------|---------------------------------------------------------------------------------------|---------------------------------------------------------------------------------------------------------|------------------------------------------------------------------------------------------|---------------------|----------|
| NC(1:1)Se-C-YS 2/1                                         | Metal salt infiltration + selenization                                                | 342.4<br>{200}<br>[0.5]                                                                                 | 198.5<br>[5.0]                                                                           | 0.001-3.0           | Our work |
| Co-Ni-Se/BWCF-160                                          | Microwave precipitation + ion exchange + chemical etching + hydrothermal selenization | 403<br>{100}<br>[0.1]                                                                                   | 211<br>[1.0]                                                                             | 0.01-3.0            | S1       |
| NiCoSe <sub>2</sub> @C                                     | Hydrothermal method + dopamine coating + carbonization                                | 370.56<br>{100}<br>[0.1]                                                                                | 252.3<br>[5.0]                                                                           | 0.5-2.8             | S2       |
| NiCo <sub>2</sub> Se <sub>4</sub>                          | Solvothermal method                                                                   | 284<br>{200}<br>[1.0]                                                                                   | 220<br>[5.0]                                                                             | 0.4-2.9             | S3       |
| NiCoSe <sub>x</sub> /CG                                    | Hydrothermal method + selenization                                                    | 206.8<br>{100}<br>[0.1]                                                                                 | 140<br>[5.0]                                                                             | 0.5-2.9             | S4       |
| Ni <sub>3</sub> Se <sub>4</sub> @CoSe <sub>2</sub> @C/CNTs | Precipitation (MOF) + selenization                                                    | 295<br>{300}<br>[0.5]                                                                                   | 200<br>[3.0]                                                                             | 0.01-3.0            | S5       |
| CoSe <sub>2</sub> /NiSe <sub>2</sub> @NC-CNT               | Wet-chemistry approach + selenization                                                 | 305<br>{300}<br>[0.1]                                                                                   | 289<br>[5.0]                                                                             | 0.01-3.0            | S6       |
| MNCS50                                                     | Solvothermal method                                                                   | 473<br>{60}<br>[0.05]                                                                                   | 293<br>[1.0]                                                                             | 0.01-3.0            | S7       |
| NiCo <sub>2</sub> Se <sub>4</sub> @NPC                     | Precipitation (MOF) + selenization                                                    | 462.14<br>{70}<br>[0.1]                                                                                 | 371.3<br>[2.0]                                                                           | 0.01-3.0            | S8       |

- S1 M. Gao, Y. Xue, Y. Zhang, C. Zhu, H. Yu, X. Guo, S. Sun, S. Xiong, Q. Kong and J. Zhang, Growing Co–Ni–Se nanosheets on 3D carbon frameworks as advanced dual functional electrodes for supercapacitors and sodium ion batteries, *Inorg. Chem. Front.*, 2022, **9**(15), 3933-3942.
- S2 Y.-H. Zhang, J.-L. Wang, H.-Y. Yan, J.-T. Zhao, D.-D. Wang, S.-H. Luo, Q. Wang and X. Liu, Short rod-like NiCoSe<sub>2</sub> binary-metal selenide nanomaterials of carbon-coated as high-performance anode for sodium-ion batteries, *Ionics*, 2023, 1-11.
- S3 W. Zhong, Q. Ma, W. Tang, Y. Wu, W. Gao, Q. Yang, J. Yang and M. Xu, Construction of a bimetallic nickel–cobalt selenide pompon used as a superior anode material for high performance sodium storage, *Inorg. Chem. Front.*, 2020, **7**(4), 1003-1011.
- S4 D. Li, H. Liu, H. Liu, Y. Chen, C. Wang and L. Guo, A NiCoSe<sub>x</sub>/CG heterostructure with strong interfacial interaction showing rapid diffusion kinetics as a flexible anode for high-rate sodium storage, *Dalton Trans.*, 2023, **52**(16), 5192-5201.
- S5 H. Zhu, Z. Li, F. Xu, Z. Qin, R. Sun, C. Wang, S. Lu, Y. Zhang and H. Fan, Ni<sub>3</sub>Se<sub>4</sub>@CoSe<sub>2</sub> hetero-nanocrystals encapsulated into CNT-porous carbon interpenetrating frameworks for high-performance sodium ion battery, *J. Colloid Interface Sci.*, 2022, **611**, 718-725.
- S6 S. Chen, H. Ma, X. Zhou, D. Jin, J. Yan, G. Wang, W. Zhao, J. Yun, H. Zhang and Z. Zhang, Heterostructure Interface Construction of Cobalt/Nickel Diselenides Hybridized with sp<sup>2</sup>–sp<sup>3</sup> Bonded Carbon to Boost Internal/External Sodium and Potassium Storage Dynamics, *ACS Appl. Energy Mater.*, 2022, **6**(1), 424-438.
- S7 P. Santhoshkumar, N. Shaji, G. S. Sim, M. Nanthagopal, J. W. Park and C. W. Lee, Facile and solvothermal synthesis of rationally designed mesoporous NiCoSe<sub>2</sub> nanostructure and its improved lithium and sodium storage properties, *Appl. Mater. Today*, 2020, **21**, 100807.
- S8 L. Li, J. Zhao, Y. Zhu, X. Pan, H. Wang and J. Xu, Bimetallic Ni/Co-ZIF-67 derived NiCo<sub>2</sub>Se<sub>4</sub>/N-doped porous carbon nanocubes with excellent sodium storage performance, *Electrochim. Acta*, 2020, **353**, 136532.
